# Supplementary material
Source: publisher figshare collection journal article supplement (https://geolsoc.figshare.com/ndownloader/files/35986056)
Supplement: Supplementary file 1 [file 35986056]

## Sheet: Planilha1
Table S3: Detailed mineral assemblage, fluid inclusion, and O, D, C, S isotope data organized by hydrothermal zones of each studied deposit of the AFMP
Deposit	Type	Hydrothermal alteration zones	Assemblage	Mineral Chemistry				Fluid Inclusions in quartz				Stable Isotopes					Reference
				Chlorite Classification	Geothermometer	White Mica	Geobarometer (muscovite)	Type/Composition	Th	Salinity (wt% NaCl equiv.)	T vs. P (isochore) (mode)	Mineral/fluid	δ13C	δ18O	δ37D	δ34S
Paraiba	1	Mu (phyllonite)	Py1 + Ms1			Wm-1	2.8 to 3.7 kbar										Siqueira 1997; Silva and Abram 2008; Trevisan 2015; Poggi 2019
		Bt (phyllonite)	Qz + Bt + Phl + Cal + Py1 + Chl1 ± Au	Type 1 - Brunsvigite and ripidolite	385 a 408ºC
		Veinlets	Qz + Cal + Ccp ± Au
		Ore qz-vein	Qz + Py2-Py3 + Au + Ccp + Mag ± Cal ± Chl2 ± Bi-Te phases					Type: 1-C, 2-AC, 3-A, 4-A	1(30-31°C), 2(200-350°C), 3(200-340°C, 4(103-207°C)	2(4.5-25), 3(1-4), 4(13-24)
		Chl-Cb (phyllonite)	Qz + Ms2 + Py4 + Au + Ccp + Chl2 ± Cal	Type 2 - Brunsvigite, ripidolite and diabanite	321 a 348ºC	Wm-2	5.0 to 6.5 kbar
		Ore vein	Qz + Py5 + Au + Ccp + Chl2 + Sp + Ga
Paraiba	2	Potassic	Qz + Bt + Hem + Ab + Mag + Mc + Mol
		Phyllic (sericitic) (ore) Mu-Mo haloes (ore)	Qz + Ms3 + Cal + Rt + Ill + Ttn			Wm-3 Wm-4	1.6 to 3.5 kbar 2.6 to 4.3 kbar
		Ms veinlets	Qz + Ms4 + Py + Ccp + Mol
		Propylitic	Qz + Cal + Au + Ccp + Chl3 + Rt + Ill + Ep + Mn-Cal	Type 3 - Brunsvigite and diabanite	272 a 368ºC
		Cb-Ep stockworck (ore)	Qz + Cal + Au + Rt + Ep + Mn-Cal + Mol ± Ill ± Py
		Late phases	Qz + Ms5 + Cal + Fl			Wm-5
		Fe - Cu oxidation	Cv + Gtn + Ag-Se-Te
Peteca	1	Bt (mylonite)	Qz + Bt+ Ms + Py + Cal														Teixeira 2015; Quispe 2015; Pimenta 2019; Oliveira 2019
		Chl - Ms - Cb (phyllonite)	Qz + Cal + Chl + Ilm + Rt + Ms + Py	Type 1 - Ripdolite	357 a 376ºC	Wm-1 (Phengite)	3.3 to 6.1 kbar
		Fractures and veinlets infill	Qz + Cal + Py + Ccp + Sp+ Grk+ Gn+ Hesite
		Vein (ore)	Py1 +Au1 (Py2+Au2 + Ccp + Sp + Gn)					Type: 1-C, 2-AC, 3-A	2(156-359°C), 3(184-367°C)	2(6-21), 3(0.1-12)
Peteca	2	Albite	Ab + Qz
		Potassic	Mc ± Qz
		Propylitic	Cal + Ep + Chl + Py (+ Au) ± Qz ± Ilm ± Rt ± Ccp ± Ga ±	Type 2 - Ripidolite	292 a 384ºC	Wm-2 (Ilite), Wm-3 (muscovite)	0.9 to 3.9 kbar
		Chloritic	Chl + Ilm + Rt	Type 3 - Ripidolite and Brunsvigite
		Muscovite - Illite	Ms + Ill + Hd. Fe + Qz
		Fe - Cu oxidation	Py2 + Cov ± Qz ± Fe Hd ± Se-Te-Ag
		Cb - Ep Stockwork	Ep + Cal + Rt + Mn-Cal + Lx + Syn + Sd ± Ap ± Ttn
Serrinha de Guarantã	1	Propylitic	Chl1 + Ep + Cb + Qz + Py ± Ser ± Phl ± Ccp	Type 1 - Brunsvigite	320 a 330ºC												Rodrigues et al. 2018; Rios 2019
		Potassic-carbonatic	Phl + Cal + Kfs + Qz ± Bn ± Cct ± Ccp ± Fl ± Ser									Cal	-2.5 - -2.7‰	6.5-7.5‰
		Vein and veinlets	Qz + Chl2 + Bn + Cct + Brt + Cal + Dol ± Au ± Ga ± Ag	Type 2 - Brunsvigite, Clinochlore, Penninite and Diabandite	177 a 224ºC
		Supergene mineralization	Cct + Cpr + Chy + Mlc + Ams ± Dol
Buriti/ Porteira	1	Potassic	Qz + Mc + Bt + Ep + Rt + Sch + Py + Ccp														Oliveira 2017; Alves et al. 2019
		Propylitic	Qz + Mc + Ep + Cb + Chl1 + Ser + Rt + Py + Ccp	Type 1 - Clinochlore	375 a 516ºC
		Sericitic	Qz + Ser + Chl2 + Rt + Py + Ccp	Type 2 - Clinochlore	126 a 530 ºC
		Vein (ore)	Qz + Py + Ccp + Au ± Cv ± Tel
		Carbonatic	Qz + Ep + Cb ± Py ± Ccp
Luiz Bastos	1	Chloritic (phyllonite)	Qz + Bt + Cal + Py + Cpy + Chl ± Au ± Ag	Type 1 - Ripidolite	339 a 413 ºC	Phengite											New data
Luiz Bastos	3	Chloritic	Qz + Chl + Cb + Ccp ± Sp ± Gn ± Py	Type 2 - Brunsvigite and Diabandite	123 a 263 ºC	Phengite	0.6 to 3.0 kbar
Serrinha de Matupá	2	Incipient	Qz + Or + Ttn + Mag + Ilm + Mc + Ab + Chl + Ph + Ep + Py1 + Py2 + Rt + Cal +Ms	Type A - Brunsvigite and Diabandite	192 a 356ºC	Type 1 - Phengite	1.2 to 4.6 kbar	Type: 1-C, 2-AC	1( 0 - 28°C), 2(220 - 360°C)	2(4-7)		Qz		8.2 ‰	1.7 - 4.7 ‰ and 15 – 20 ‰		Moura 1998; Moura et al. 2006
		Potassic/K-silicate	Qz + Mc + Ph + Py1 + Py2 + Rt + Au1					type 1-C/Type: 2-AC	2(330 - 365°C)	2(4-7)	330-365°C, 1.6-2.1 kbar	Qz, Chl, fluid		Qz 7-10.7 ‰ f 1.1-4.8 ‰		2-3.3 ‰
		Sodic	Ab + Aeg +Rt
		Mn-Chloritic (ore)	Mn-Chl + Qz + Mn-Ep + Py1 + Sp + Sps + Mag +Ser + Rt + Au1	Type C - Brunsvigite and Diabandite	360 a 380ºC	Type 2 - Phengite	3.3 to 4.5 kbar	A+halite	375° - 480°C	45–57	375 - 480°C, > 1.3 kbar	Py, Qz, Chl, fluid		Qz 10.7-11.8 / Chl 3.7 / f 1.1-8.2	Chl -69 ‰ f -37 ‰	Py 2.1 ‰
		Phyllic	Ms+Qz + Mag + Chl + Ph + Py2 + Rt + Au2	Type B - Penninite and Clinochlore	213 a 282ºC	Type 3 - Phengite	3.3 to 4.5 kbar	Type: 3-A, Type-5b	3- 293-330°, 5b-293-365°	3- 21-24	3- 220-339°C, 1.3-3.3 kbar; 5b- 293-365°, 1.5-2.4kbar	Py, Qz, Chl, Ms, fluid		Qz 10.1-10.6 / Chl 4 ‰ / Ms 6.4 % / f 1.7-4.7 ‰	Chl -54 ‰ / Ms -57 ‰ / f -20 and -20 ‰	Py 1.3 - 3.5 ‰
		Carbonatic alteration	Qz + Chl + Ph + Rt + Cal + Anh					Type 4	4- 172-187°C	4-0-35	289-354°C, 0.5-0.8 kbar
		Mc Alteration	Qz + Mc + Chl + Aeg + Py3 + Cal + Anh					Type 5 -A	5- 180-200	5- 21-24	300-350°C, 0.5-1.1 kbar
Juruena	2	Potassic (ore 1)	Ksf + Py + Ser + Hem + Fl + Qz + Chl + Ccp + Bn + Gn + Syt + Au + Au-Ag Telluride ± Rt					Type: 1-AC, 2-A	1(341 - 456°C), 2(280 - 385°C)	1- 1-11, 2- 2-16		Qz, fluid, Py and Ccp		Qz 9-11.3 ‰ / f 4.1-6.9 ‰		Py -3.1 - -7.8 ‰ / Ccp -3.1 - -7.1 ‰	Acevedo 2014
		Sericitic	Kfs + Py + Ser + Qz + Chl + Mol ± Ms ± Ccp					Type: 3-A+halite, Type-4 A	3(239-349°C, 4(155-285°C)	3- 31-36, 4-0.4-14		Qz, fluid and Py		Qz 10.5-10.7 ‰ / f 0.5-4.4 ‰		Py -4-0.3 ‰
		Carbonatic (ore 2)	Cal + Fl + Py + Ccp + Au + Sp + Au-Ag Telluride ±Ser ± Qz									Py and Ccp				Py 1.5 ‰ / Ccp -1.9 ‰
		Silica alteration	Qz + Ser ± Cal									Qz		Qz 12.4-12.7 ‰
		Propylitic	Ep + Chl ± Py ± Qz ± Cal
Pé Quente	2	Sodic	Ab + Qz									Qz, Ms, Ser, Ab, Kfs, Py		Qz 10.5-16.5 ‰ / Ms 7-7.7 ‰ / Ser 6.8-9.4 ‰ / Ab 8.6-9.4 ‰ / Kfs 8.2-10.1 ‰	Ms -63 - -49 ‰ / Ser -65 - -49 ‰	Py -4.8 - 1.8 ‰	Assis 2015
		Disseminated ore	Ab + Qz + Py + Brt + Hem + Ccp + Ap + Rt + Mnz + Ga + Wul + Au +Or + Mc
		Potassic	Or + Mc + Ccp ± Qz
		Sericitic	Ser + Ms + Ph + Ccp + Hem + Py ± Qz
		Carbonatic	Cal ± Qz ± Ser
		Ms Alteration	Ms ± Ser ± Or ± Py ± Qz
		Disseminated ore	Py + Hem + Ccp + Rt + Mnz + Ga + Wul + Au + Or
		Silicic	Qz + Py + Ccp
		Venular Sodic	Qz + Py + Rt + Aln + Ep					Type : 1-AC, 2-A.	1(252 - 335°C), 2(127 - 268°C)	1(6-9), 2(2-26)
		Venular Ore	Qz + Py + Brt + Ccp + Rt + Au
		Propylitic	Clh + Ep + Czo + Tr + Ap + Mnz + Py + Ccp + Ttn + Prh + Act ± Qz
		Vein	Ep + Czo + Tr + Cal ± Chl ± Rt ± Qz
Luizão	2	Incipient sodic alteration	Ab + Qz									Qz, Ser, Kfs, Chl and Py		Qz 10.8-13.3 ‰ / Ser 8.85-8.86 ‰ / Kfs 9-9.33 ‰ / Chl 4.3-5.1 ‰	Ser -51- -34 ‰ / Chl -55 - -52 ‰	Py -4.6 - -1.8 ‰	Assis 2015
		Potassic	Mc + Hem
		Phyllic	Ser + Ms + Qz + Fe-Chl + ore					Type : 1-A, 2-A	1(61-185°C), 2(200-280°C)	1(2.5-15), 2(33.6-37)	110-130°C, 0.9-1.2 kbar
		Ep - Ap - Ca-Mg carbonate veinlets	Ap + Ep + Cal + Mg-Cal
		Ore	Qz + Kfs + Ms + Ser + Ccp + Ga + Py + Au + Sp + Cb + Ep + Hem + Ttn + Rt + Mnz
X1	2	Potassic	Qz + Or									Qz, Ms, Ser, Py and Mol		Qz 9.97-10,80 ‰ / Ms 6 - 9 ‰	Ms -56 - -48 ‰	Py -6 - -2 ‰ / Mol 3.6-2.1 ‰	Rodrigues 2012; Assis 2015
		Phyllic	Qz + Py + Ms + Ccp + Ser + Mol + Sp + Tsu ± Ep					Type: 1-AC, 2-A	1(218 - 335°C), 2(125 - 268°C)	1(6-9), 2(2-27)	<126°C, 1-3.5 kbar / <350°C, 3.5-12.5 kbar
		Ore	Py + Hem + Ccp + Ap + Mnz + Rt + Ms + Au + Tsu + Mol + Sp + Ser + Hessite ± Qz ± Ga ± Cv
		Distal Propylitic	Ep + Chl + Py + Ccp + Cal ± Qz
		Distal Chloritic	Chl + Cal + Rt + Ap + Qz
		Later calcite veinlets	Cal ± Chl ± Ep ± Rt ± Qz
Luiz	3	Potassic	Kfs + Qz + Hem ± Ep ± Cb														Trevisan 2015
		Propylitic	Qz + Ep + Czo + Cb + Chl ± Kfs ± Ser
		Sericitic	Ser + Qz + Cb + Chl + Ccp + Sp + Ga ± Au			Wm-1 (phengite)
		Chloritic	Chl + Cb + Qz + Ccp + Mag + Sp + Ga ± Py ± Au	Brunsvigite	233 a 300ºC
		Quartz vein (ore)	Qz + Py + Sp + Ga + Ccp + Au + Brt ± Ap ± Rt					1- A
		Quartz infill	Qz
		Late veinlets	Qz + Ep + Cb + Chl + Ser
Pezão	3	Potassic	Kfs + Qz ± Ser ± Hem														Trevisan 2015
		Sericitic	Qz + Ser + Cb + Chl ± Kfs			Wm-1 (phengite)
		Chloritic	Qz + Chl + Cb + Py + Ccp	Brunsvigite	249 a 315ºC
		Quartz vein (ore)	Qz + Py + Ccp + Au + Ga + Sp + Brt ± Mnz ± Cv ± Hem ± Rt ± Xtm ± Hessite					1 - A
		Carbonate infill	Qz + Cb
		Late veinlets	Qz + Cb
Papagaio	3	Potassic	Qz + Mc + Bt + Py ± Hem ± Mag														Silva and Abraam 2008; Galé 2018; Gale et al. 2018
		Sericitic	Qz + Ser + Py + Ccp									Py, Qz and Ser		Qz 10.3 ‰ / Ser 7.2 ‰	Ser -48 - -61‰	Py 2,7 ‰
		Veinlets (Ore)	Qz + Ser + Py + Ccp + Au + Gn + Mag + Sp ± Hem ± Apy					Type: 1- AC, 2-A	1 (>325) 2(115 - 216°C)	1(2.4-7.2), 2(0.5 - 24)	315-325°C, 1.5-1.7 kbar	Qz and Py		Qz 8,2-10.3 ‰		Py 1.7-2.7 ‰
		Propylitic	Chl + Ep + Qz + Cb + Ap + Ab + Act
		Barren veinlets	Qz					Type: 2- A, 3-A	2(136-190°C), 3(323-403°C)	2(26-30), 3(40-48)	152-170°C, <0.5 kbar
Francisco	3	Post-magmatic	Or + Hem ± Qz									Qz, Ser, Kfs, Hem, Py, Sp and Ga		Qz 8.3-15.4 ‰ / Ser 4.6-6 ‰ / Kfs 7.9 ‰ / Hem -5.6 - 4.7 ‰	Ser -88 - -85 ‰	Py -2.6 - -1.4 ‰	Miguel Jr. 2011; Assis 2015
		Potassic	Or + Hem + Qz + Bt
		Sericitic	Ser + Ms
		Orthoclase - Chlorite - Clinozoisite	Or + Ep + Chl + Czo + Ap
		Argillic	Ser + Kln + Hem
		Silicic	Qz + Py + Sp1 + Sp2 + Ill + Aln ± Chl					Type: 1-A	85-184 °C	7 - 24	85-373°C, <0.75 kbar
		Ore (venular)	Py + Sp1 + Sp2 + Sp3 + Ga + Ccp + Dg + Hem + Bn + Mag + Cv + Cct + Au + Ag + Gek
		Ore (disseminated)	Py + Sp1 + Sp3 + Ga + Ccp + Dg + Hem + Cv + Cct + Au + Ag ± Mag ± Chl
		Propylitic	Chl + Czo + Ep + Ap + Cal + Prh
Pombo (Au-Cu-Bi)	4	Late-magmatic	Bt2 + Kfs2 + Pl2 + Qz1 + Chl1 + Chl2 + Chl3 + Ep1 +Ms1 + Ts ± Pl4	Type 1,2 and 3 - Ripidolite, Picnochlorite and Diabanite				CO₂, H₂O-NaCl-KCl-(F) and H₂O-CO₂-NaCl-KCl-(F)	>340ºC	1(1-15)	220-340°C, 1.3-2.6 kbar						Biondi et al. 2006, 2007; Biondi 2009
		Sodic	Kfs3 + Ts + Pl5 + Chl3	-
		Potassic	Kfs4 + Phl ± Mag						110 e 370ºC
		Propylitic	Act + Qz2 + Ap2 + Mag + Hem + Sp2 + Chl4 + Cb1 + Ep2 ± Ms2 ± Py1	Type 4 - Picnochlorite					3(130 - 370°C)	3(2-16)	240-330°C, 1.4-1.9 kbar
		Phyllic	Chl5 + Mag + Hem + Ms2 + Py1 ± Au	Type 5 - Brunsvigite and Picnochlorite		Ms 1 and 2 - phengite	3.5 to 5.9 kbar
		Fault-Related ore	Qz3 + Mag + Hem + Ill2 + Chl6 + Cb2 + Ms3 + Fe Ox+ Py2 + Au2 + Ccp + Ga + Dg + Cv + Wtt + Emp	Type 6 - Brunsvigite, Ripidolite				H₂O-NaCl-KCl-(F) and H₂O-CO₂-NaCl-KCl-(F)	4(210-270°C)	4(33-36)	290-340°C, 1.1-1.3 kbar
		Superficial ore		Type 6 - Brunsvigite, Ripidolite				H₂O-NaCl-KCl-(F) and H₂O-CO₂-NaCl-KCl-(F)	5(280-430°C)	5(40 e 57)
Type-D Veinlet according to Gustafson e Hunt (1975) and Sillitoe (2010) classification. Abbreviations : Ab, - albite, Ams- amorphous sillia, Brt- barite, Bt- biotite, Bmt- bismuthinite, Cal- calcite, Cb- carbonate, Cbn- cubanite, Ccp - chalcopyrite, Chl- chlorite, Cpr- cuprite, Dg- digenite, Dol- dolomite, Ep- epidote, Fl- fluorite, Gn- galena, Grt- garnet, Hem- hematite, Ilm- ilmenite, Ilt- llit…
